# Supplementary material for: Higher Maternal Diet Quality during Pregnancy and Lactation Is Associated with Lower Infant Weight-For-Length, Body Fat Percent, and Fat Mass in Early Postnatal Life
Source: PubMed Central journal article supplement (PMC6471184; doi:10.3390/nu11030632), 2019-03-15
Supplement: nutrients-11-00632-s001.pdf [file nutrients-11-00632-s001.pdf]

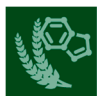

**Table S1.** Maternal Healthy Eating Index–2015 (HEI–2015) subcomponent scores during pregnancy by tertiles of maternal HEI–2015 total scores during pregnancy (n=329).

| HEI-2015 subcomponent scores                  | HEI-2015 Tertiles (T)a |               |               | P-value |
|-----------------------------------------------|------------------------|---------------|---------------|---------|
|                                               | T1<br>(n=106)          | T2<br>(n=107) | T3<br>(n=106) |         |
|                                               | Mean ± SD              |               |               |         |
| <b>Total Fruits<sup>b</sup></b>               | 3.8 ± 1.4              | 4.6 ± 0.8     | 4.9 ± 0.3     | <0.001* |
| <b>Whole Fruits<sup>b</sup></b>               | 4.4 ± 1.1              | 5.0 ± 0.2     | 5.0 ± 0.0     | <0.001* |
| <b>Total Vegetables<sup>b</sup></b>           | 3.4 ± 1.0              | 3.9 ± 0.9     | 4.0 ± 0.9     | <0.001* |
| <b>Greens and Beans<sup>b</sup></b>           | 2.9 ± 1.5              | 4.3 ± 1.2     | 4.5 ± 1.0     | <0.001* |
| <b>Whole Grains<sup>c</sup></b>               | 2.2 ± 1.1              | 2.8 ± 1.4     | 3.4 ± 1.7     | <0.001* |
| <b>Refined Grains<sup>c, d</sup></b>          | 7.2 ± 2.1              | 8.2 ± 1.7     | 9.1 ± 1.2     | <0.001* |
| <b>Dairy Products<sup>c</sup></b>             | 7.4 ± 2.3              | 7.3 ± 2.6     | 7.3 ± 2.5     | 0.97    |
| <b>Total Protein Foods<sup>b</sup></b>        | 4.4 ± 0.9              | 4.7 ± 0.7     | 4.9 ± 0.4     | <0.001* |
| <b>Seafood and Plant Proteins<sup>b</sup></b> | 3.5 ± 1.4              | 4.4 ± 1.0     | 4.9 ± 0.4     | <0.001* |
| <b>Unsaturated:Saturated Fats<sup>c</sup></b> | 2.9 ± 1.9              | 4.7 ± 2.1     | 7.0 ± 2.3     | <0.001* |
| <b>Sodium<sup>c, d</sup></b>                  | 4.8 ± 2.3              | 5.2 ± 1.8     | 5.9 ± 2.0     | <0.001* |
| <b>Saturated Fats<sup>c, d</sup></b>          | 3.3 ± 2.4              | 4.9 ± 2.1     | 6.4 ± 1.8     | <0.001* |
| <b>Added Sugars<sup>c, d</sup></b>            | 7.3 ± 2.4              | 8.0 ± 1.9     | 8.9 ± 1.2     | <0.001* |

<sup>a</sup>HEI-2015 T1: ≤63.9; T2: 64.0-70.9; T3: ≥70.9

<sup>b</sup>Maximum of 5 points

<sup>c</sup>Maximum of 10 points

<sup>d</sup>Higher scores correspond to lower intake

\*P<0.05 for tests of differences in maternal diet composition by tertiles of HEI–2015 total scores during pregnancy using one-way ANOVA

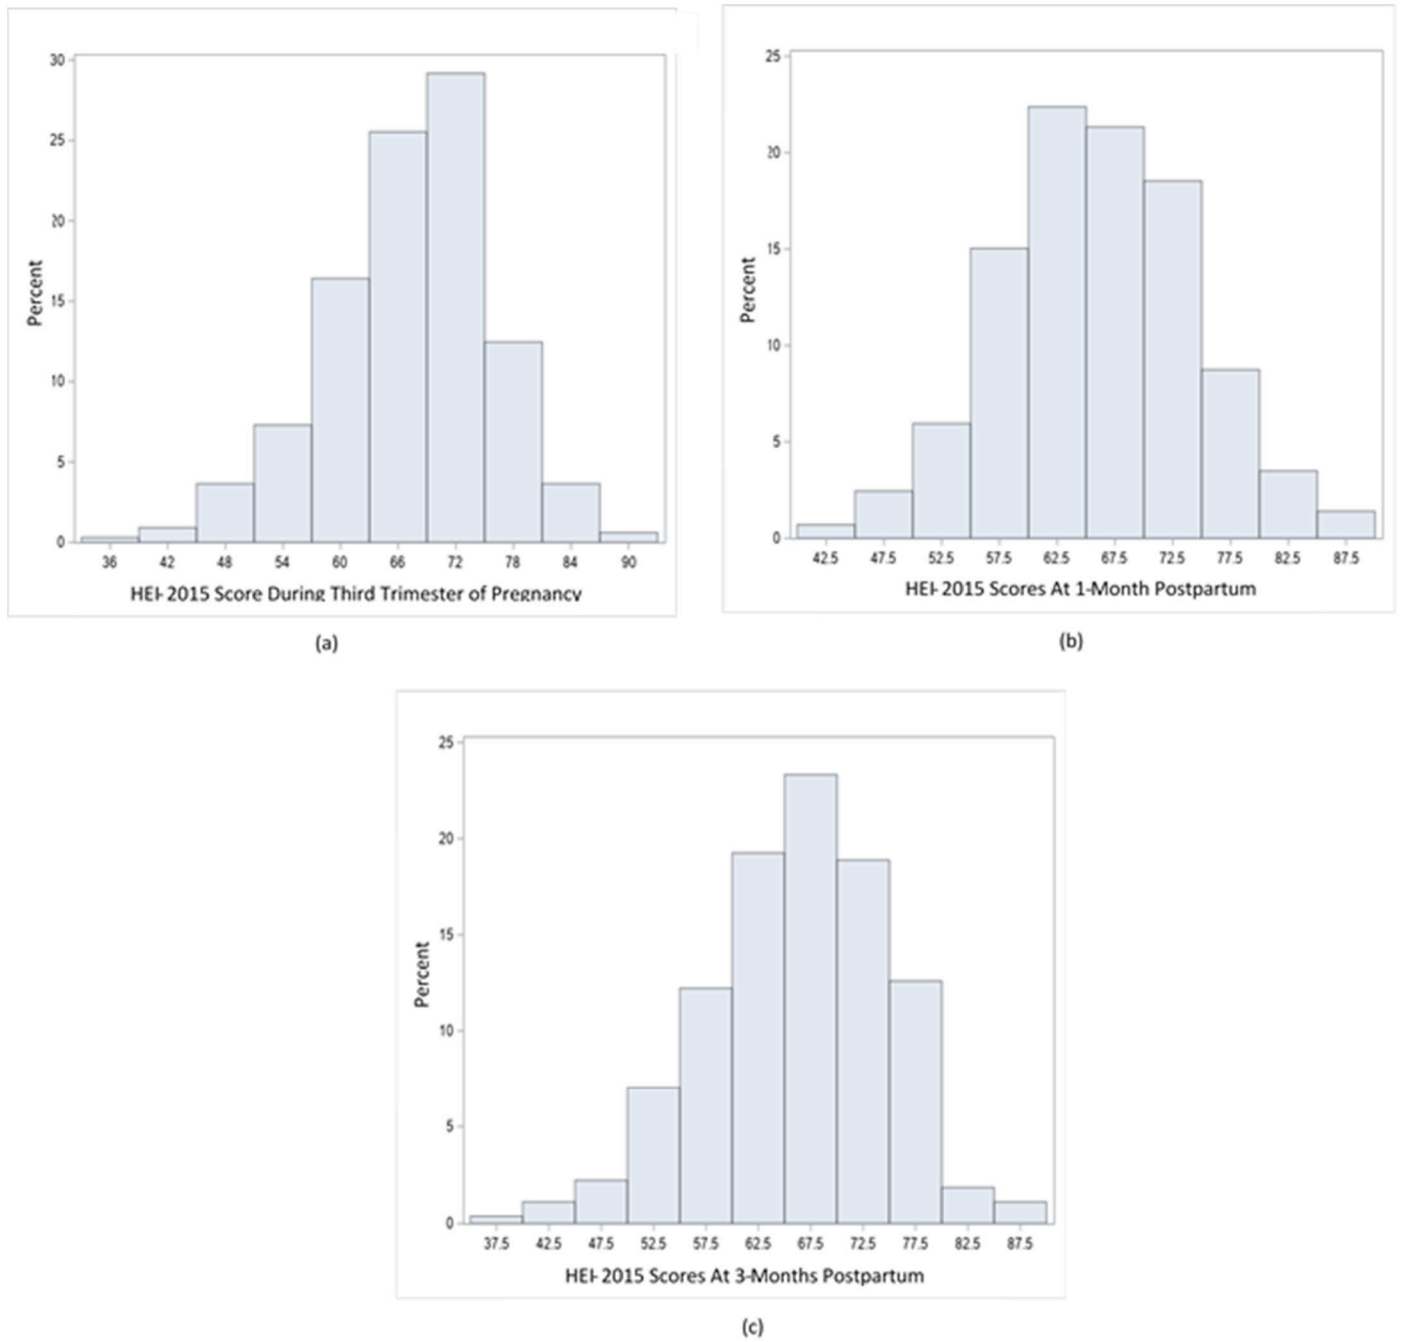

**Figure S1.** Distribution of Maternal Healthy Eating Index–2015 (HEI–2015) scores: (a) During the third trimester of pregnancy (T1:  $\leq 63.9$ ; T2: 64.0–70.9; T3:  $\geq 70.9$ ); (b) at one month postpartum (T1:  $\leq 61.8$ ; T2: 61.9–69.7; T3:  $\geq 69.8$ ); and (c) at three months postpartum (T1:  $\leq 62.8$ ; T2: 62.9–70.2; T3:  $\geq 70.3$ ). Abbreviations: T1 = tertile 1; T2 = tertile 2; T3 = tertile 3.
